# Supplementary material
Source: HighWire-hosted journal article supplement (http://gut.bmjjournals.com/highwire/filestream/192543/field_highwire_adjunct_files/2/Supporting_material_S3.pdf)
Supplement: Supporting_material_S3.pdf [file Supporting_material_S3.pdf]

### S3. Plantain NSP inhibits adhesion to, and invasion of Caco2-cl1 cells by adherent, invasive *E. coli* (AIEC).

Three adherent, invasive Crohn's disease *E. coli* isolates (HM605, HM615 and LF82) and the non-pathogenic reference strain *E. coli* K12 were selected to examine the effect of plantain NSP on the ability of *E. coli* to adhere to, and invade the Caco2-cl1 cell-line which was to be used to generate M-cells. Briefly, Caco2-cl1 cells were seeded ( $5 \times 10^4$  cells per 1 ml well) to 24-well tissue culture plates (Corning-Costar; High Wycombe, UK) and maintained in culture. Following pre-treatment of confluent cells for 30 min, with or without plantain NSP (0 to 50 mg/mL, in DMEM without antibiotics), each monolayer was infected for 4 h with approximately  $1 \times 10^6$  bacteria per well (MOI 10:1). Adherence and invasion was assessed using a gentamicin protection assay as previously described [Martin HM *et al. Gastroenterology* 2004;127:80-93.]

Caco2-cl1 epithelial cell invasion by all three colonic and ileal AIEC isolates investigated was inhibited by the presence of plantain NSP both at 5 and 50mg/mL. For *E. coli* K12, significant inhibition of invasion was only observed at plantain NSP levels of 50 mg/mL. Similarly, bacterial adhesion to Caco2-cl1 cells by all *E. coli* isolates assessed was also significantly blocked by the presence of plantain NSP at either 5 or 50 mg/mL. \*,  $P < .05$ ; \*\*,  $P < .01$ ; and \*\*\*,  $P < .001$ ; ANOVA (n=3).

| <i>E. coli</i> isolate | Plantain NSP (mg/mL)              |                  |                  |                                   |                 |                 |
|------------------------|-----------------------------------|------------------|------------------|-----------------------------------|-----------------|-----------------|
|                        | 0.5                               | 5                | 50               | 0.5                               | 5               | 50              |
|                        | Bacterial Invasion (% inhibition) |                  |                  | Bacterial adhesion (% inhibition) |                 |                 |
| K12                    | 0.88 ± 12.74                      | 25.44 ± 4.88     | 49.12 ± 15.37 *  | 13.13 ± 22.92                     | 46.20 ± 6.80 *  | 47.75 ± 20.25   |
| LF82                   | 14.17 ± 5.37                      | 68.46 ± 11.76 *  | 66.67 ± 2.69 **  | -2.01 ± 10.70                     | 40.97 ± 2.18 ** | 43.56 ± 13.12   |
| HM580                  | 26.52 ± 6.00                      | 67.53 ± 1.59 **  | 77.08 ± 5.41 **  | 2.49 ± 7.32                       | 45.13 ± 17.58   | 68.56 ± 11.86 * |
| HM605                  | 6.57 ± 6.89                       | 86.42 ± 1.51 *** | 90.60 ± 1.13 *** | 12.22 ± 8.17                      | 42.53 ± 6.47    | 70.89 ± 7.18 *  |
| HM615                  | 19.59 ± 14.22                     | 79.95 ± 5.22 *** | 81.80 ± 3.00 *** | 9.56 ± 10.61                      | 59.52 ± 9.38 *  | 65.43 ± 6.03 *  |
